# Supplementary material
Source: PubMed Central journal article supplement (PMC4086214)
Supplement: NIHMS594771-supplement-01.pdf [file NIHMS594771-supplement-01.pdf]

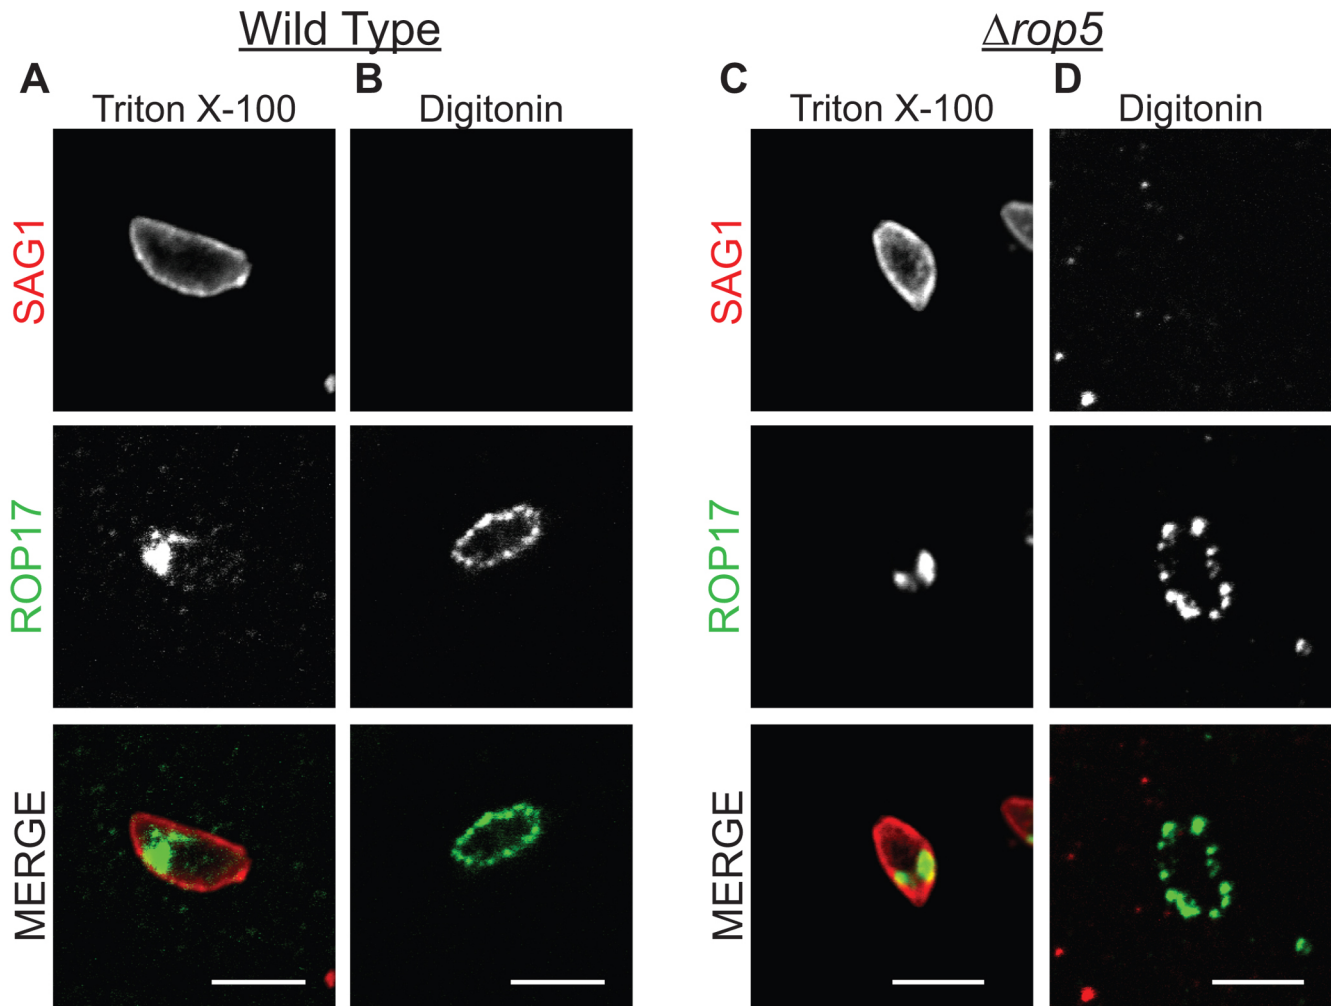

**Figure S1. Localization of ROP17 to the cytosolic face of the PVM.** Related to Figure 2. RH $\Delta ku80$  (A-B) and RH $\Delta ku80\Delta rop5$  (C-D) *T. gondii* parasites were used to challenge HFF monolayers for 30 min. Cells were fixed, and either fully permeabilized with 0.1% Triton X-100 (A and C), or partially permeabilized with 0.002% digitonin (B and D) to reveal ROP17's intracellular location in the rhoptries and the cytosolic face of the PVM, respectively. Samples were incubated with mouse anti-ROP17, visualized by goat anti-mouse IgG conjugated to Alexa 488 (green), and rabbit antisera to SAG1, visualized by goat anti-rabbit IgG conjugated to Alexa 594 (red). Absence of surface antigen 1 (SAG1) staining was used to confirm PVM integrity as seen in B and D. (Scale bars = 5 microns.).

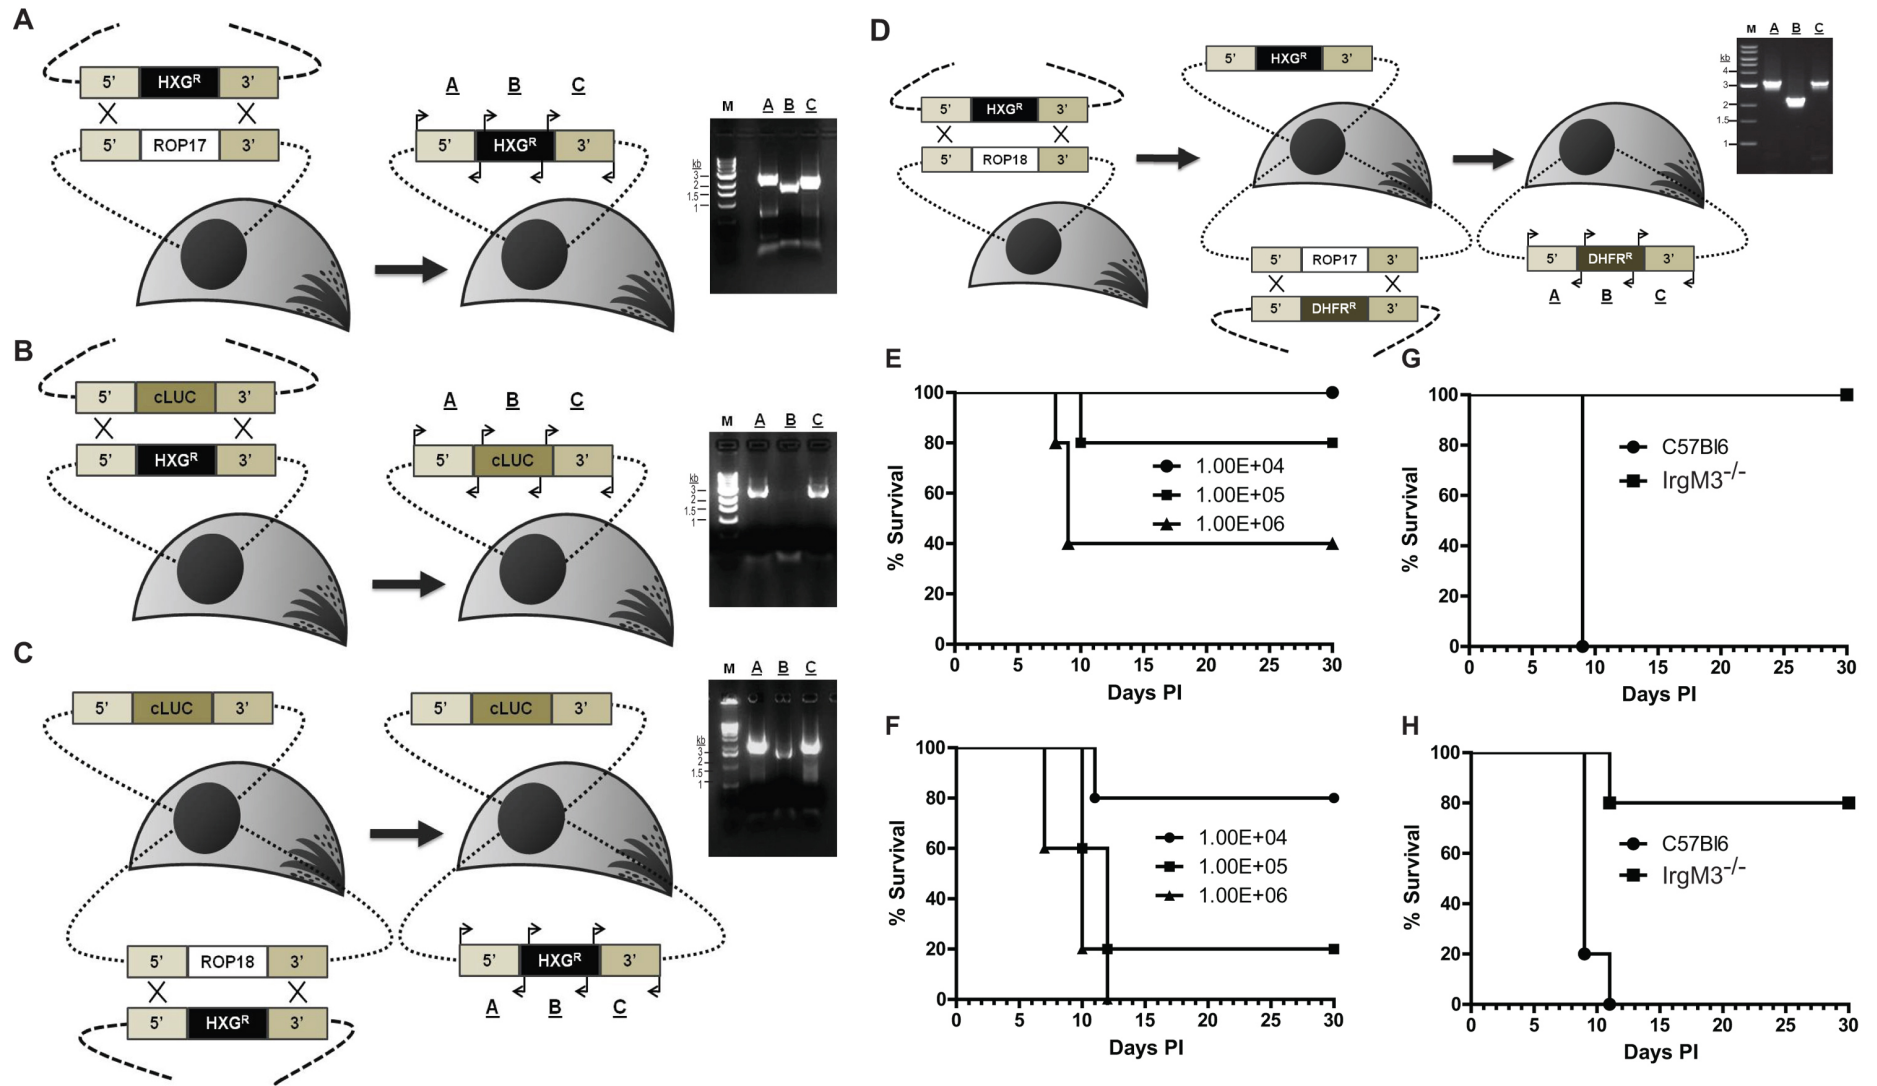

**Figure S2. Generation of the  $RH\Delta ku80\Delta rop17\Delta rop18$  and reverse double-deletion ( $RH\Delta ku80\Delta rop18\Delta rop17$ ) mutants.**

Related to Figure 4. Using the  $RH\Delta ku80$  cell line, a double crossover deletion of ROP17 was generated (A) followed by removal

of the drug selection marker HXGPRT via negative selection deletion to replace with the drug marker with the Click-Luciferase (cLUC) gene (B). The HXGPRT drug marker was recycled to delete the ROP18 gene and generate the double deletion cell line (C). To generate the reverse deletion mutant (D), *RHΔku80Δrop18* parasites were transfected with a ROP17 deletion construct containing pyrimethamine-resistant DHFR for selection and individual clones were isolated. Primers used in diagnostic PCR are shown in the diagram and a representative gel is shown for each step. (E-F) Two individually derived reverse double deletion mutants (*RHΔku80Δrop18Δrop17* (a) and (b) respectively) were inoculated ip into CD-1 mice at different parasite doses ( $10^4$ ,  $10^5$ , and  $10^6$ ) and virulence monitored for 30 days. Mean values shown per group (n = 5). The individual clones (a) and (b) used in (E-F) were used to infect parental C57Bl/6 and *IrgM3<sup>-/-</sup>* mice to demonstrate equivalent virulence attenuation relative to the original double deletion mutant *RHΔku80Δrop17Δrop18*. (E-F) Representative experiment.

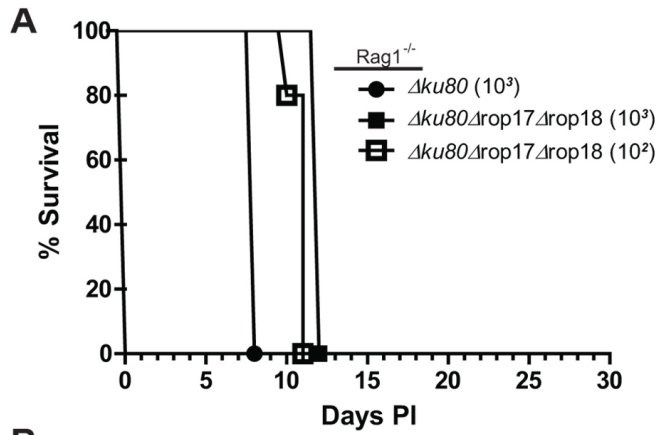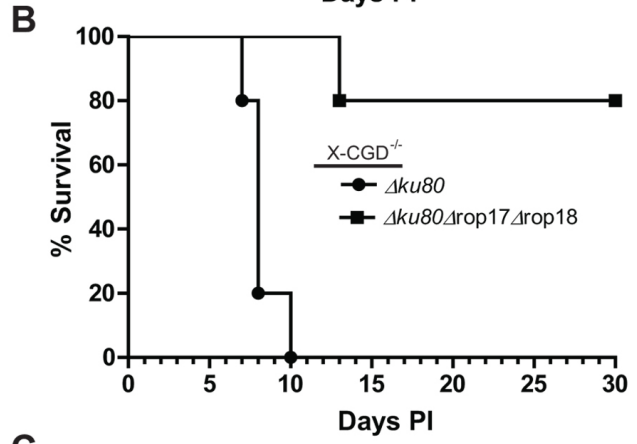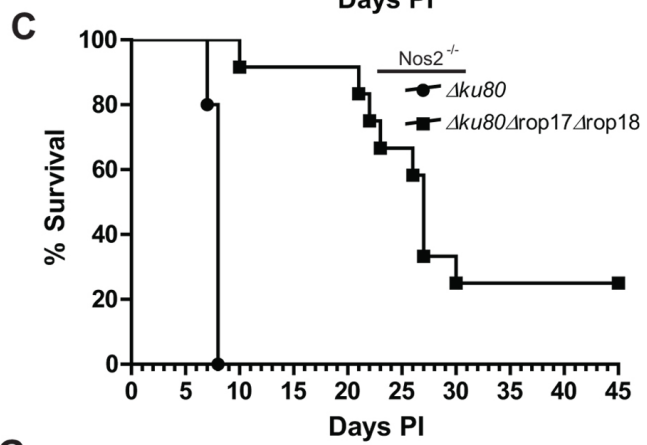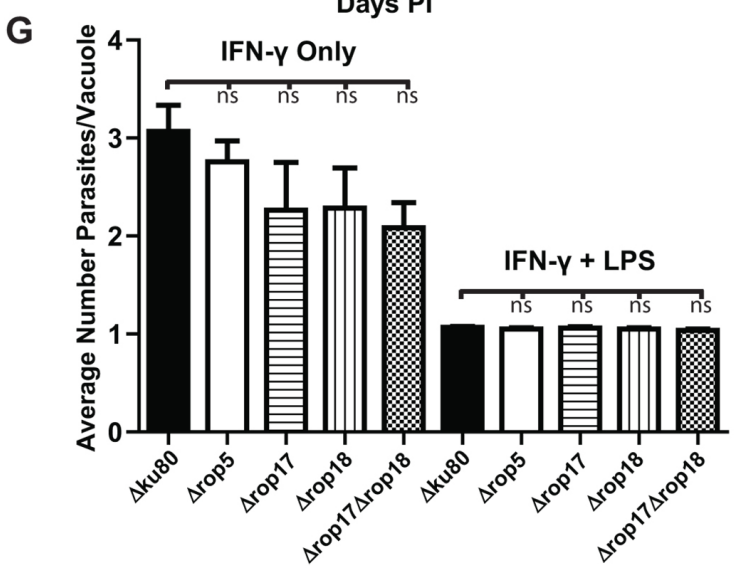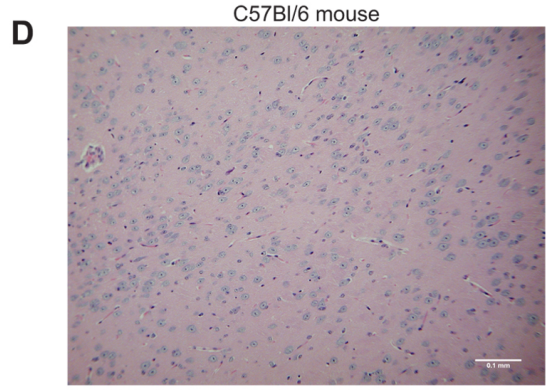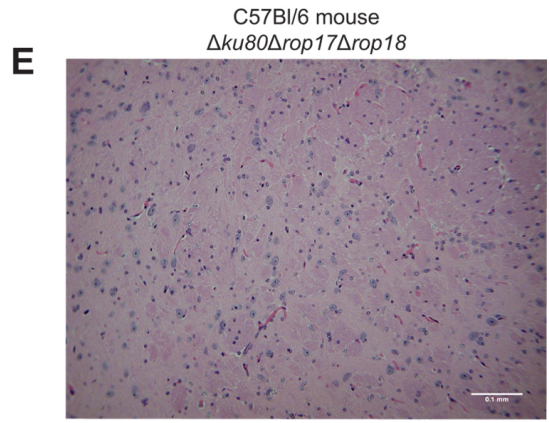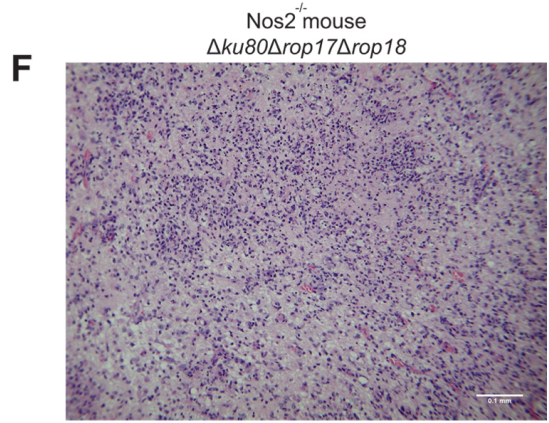

**Figure S3. IFN- $\gamma$  signaling is the major pathway for control of RH $\Delta ku80\Delta rop17\Delta rop18$  parasites.** Related to Figure 5. (A) Rag<sup>-/-</sup> mice were inoculated ip with 10<sup>3</sup> parental RH $\Delta ku80$  or 10<sup>3</sup> and 10<sup>2</sup>  $\Delta ku80\Delta rop17\Delta rop18$  double deletion parasites (n = 5 per group) and survival was followed for 30 days. (B) X-CGD mutant mice (n = 5) were inoculated ip with 10<sup>3</sup> parental  $\Delta ku80$  or  $\Delta ku80\Delta rop17\Delta rop18$  deletion parasites. Mouse survival was monitored for 30 days. (C) Nos2<sup>-/-</sup> mice were inoculated ip with 10<sup>3</sup> parental  $\Delta ku80$  (n = 5) and 10<sup>3</sup>  $\Delta ku80\Delta rop17\Delta rop18$  (n = 12) and monitored for 45 days post infection. Data are representative of two or more experiments with a similar outcome. Parental line C57Bl/6 (D-E) and Nos2<sup>-/-</sup> (F) mice were inoculated ip with 10<sup>3</sup>  $\Delta ku80\Delta rop17\Delta rop18$  parasites and the infection was allowed to proceed for 30 days to resolve the acute infection. At day 30, two surviving mice from each group were sacrificed and brains were removed, fixed in formaldehyde, and processed for histology. Hematoxylin and eosin stained slides of the brain hemispheres at the level of the thalamus were used to capture representative images. Scale bars = 0.1 mm. Representative experiment. (G) RAW 264.7 mouse macrophages activated with IFN- $\gamma$  (100 units) alone or IFN- $\gamma$  (100 units) and LPS (0.1 ng/ml) were challenged with *T. gondii* parasite strains and infection was allowed to proceed for 20 hr. Monolayers were fixed and permeabilized with 0.05% saponin and stained with rabbit antisera to SAG1, visualized by goat anti-rabbit IgG conjugated to Alexa 594 (red). The number of parasites per vacuole was counted and averaged for each parasite strain under both conditions. Means  $\pm$  SEM, n = 2 samples each, from three combined experiments. Student's *t*-test, ns, non-significant.

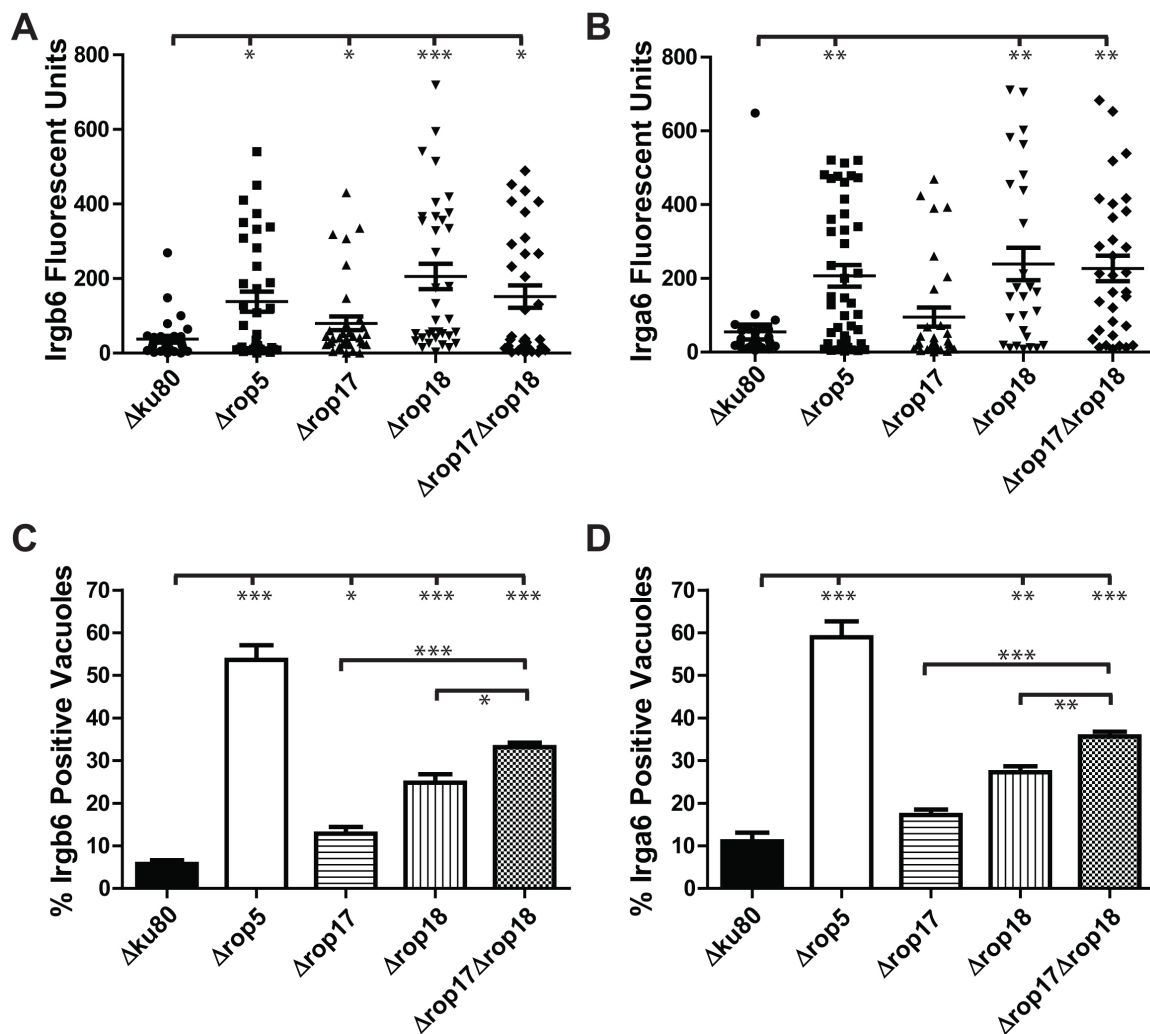

**Figure S4. Quantification of Irgb6 and Irga6 loading onto parasite-containing vacuoles.**

Related to Figure 5. (A-B) ROP kinase deletion mutants were used to infect activated RAW 264.7 mouse macrophages for 30 min followed by fixation and permeabilization with 0.05% saponin. Cells were stained with rabbit polyclonal anti-Irgb6 or mAb 10D7 Irga6, mAb Tg17-113 to GRA5 or rabbit polyclonal anti-GRA7 and DAPI. IRG loading intensity on the PVM was quantified as described in the methods from approximately 30 vacuoles per mutant. (C-D) Activated RAW 264.7 mouse macrophages were infected *in vitro* for 2 hr and processed for IF microscopy, as described above. The percentage of Irgb6 (Rb anti-Irgb6) (C) or Irga6 (mAb 10D7) (D) positive vacuoles was determined by comparison to staining with the PVM markers GRA5 or GRA7, respectively. Samples were imaged using Alexa Fluor conjugated secondary antibodies. Means  $\pm$  SEM,  $n = 3$  samples each, from three combined experiments. (A,B) Kruskal-Wallis test with Dunn's post test, (C,D) Student's *t*-test, \* $P \leq 0.05$ , \*\* $P \leq 0.01$  and \*\*\* $P \leq 0.005$ .

**A**

|               | <b>T102</b>  |              | <b>T108</b>  |              |
|---------------|--------------|--------------|--------------|--------------|
|               | <b>ROP17</b> | <b>ROP18</b> | <b>ROP17</b> | <b>ROP18</b> |
| <b>Irga6</b>  | 91           | 86.9         | 21.7         | 96           |
| <b>Irga1</b>  | 100          | 73.3         | 26.6         | 93           |
| <b>Irga2</b>  | 100          | 100          | 13           | 95.6         |
| <b>Irga3</b>  | N/A          | N/A          | 47.8         | 100          |
| <b>Irga4</b>  | N/A          | N/A          | 15.3         | 100          |
| <b>Irga7</b>  | N/A          | N/A          | 18.5         | 100          |
| <b>Irga8</b>  | N/A          | N/A          | 57.1         | 100          |
| <b>Irgb1</b>  | 82           | 48.4         | 27.2         | 51.5         |
| <b>Irgb2</b>  | 93           | 62.9         | 74           | 93           |
| <b>Irgb3</b>  | 93           | 64.2         | 10.7         | 82.1         |
| <b>Irgb4</b>  | 88           | 62.5         | 9.3          | 81.2         |
| <b>Irgb5</b>  | 93           | 60.6         | 39.3         | 75.7         |
| <b>Irgb6</b>  | 78           | 16.6         | 12.5         | 96           |
| <b>Irgb8</b>  | 92           | 61.5         | 11.5         | 80.7         |
| <b>Irgb9</b>  | 93           | 70           | 33.3         | 86.6         |
| <b>Irgb10</b> | N/A          | N/A          | 15.3         | 85           |
| <b>Irgc</b>   | 100          | 60.8         | 17.3         | 69.5         |
| <b>Irgd</b>   | N/A          | N/A          | 76.4         | 88.2         |
| <b>Irgm1</b>  | 83           | 65.2         | 21.7         | 78.2         |
| <b>Irgm2</b>  | 82           | 63.6         | 27.2         | 22.7         |
| <b>Irgm3</b>  | 80           | 70           | 20           | 50           |

**B**

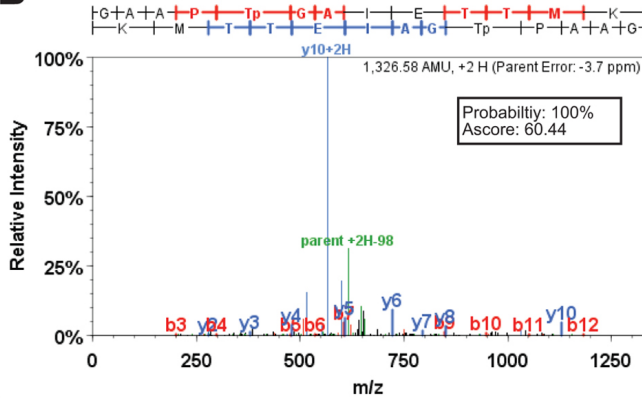

**C**

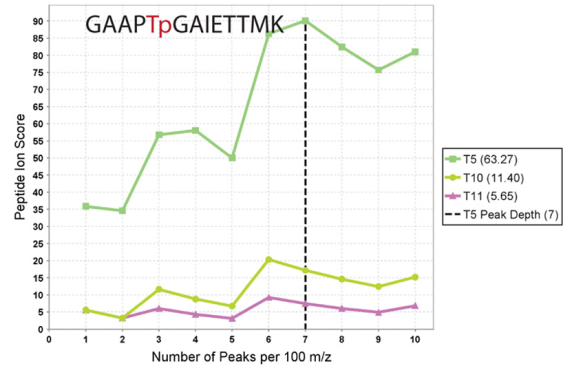

**D**

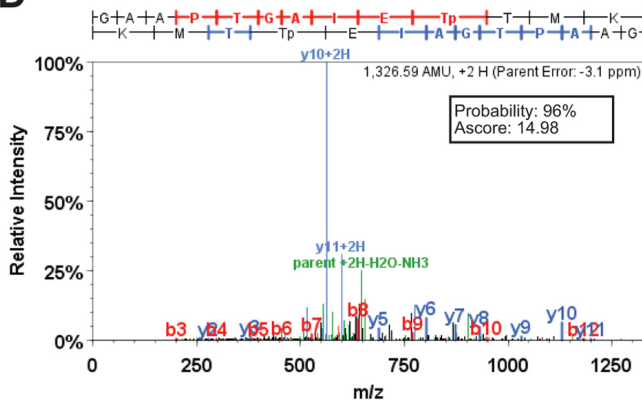

**E**

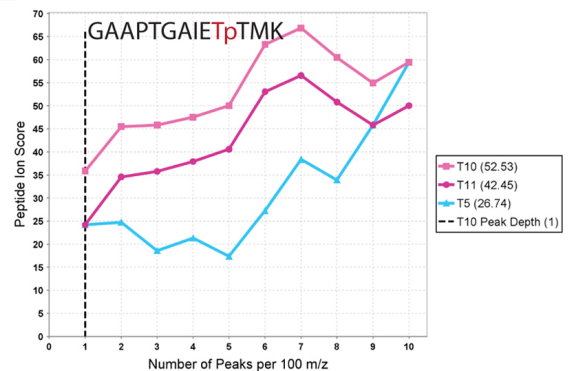

**Figure S5. Theoretical and empirical preference comparison of the Thr102 or Thr108 motif in the mouse IRG protein family by ROP kinases.** Related to Figure 6. (A) Each member of the IRG protein family listed were parsed into a series of 10 letter words (10 amino acid peptides) with Threonine (Thr) at the fifth position for every Thr present in each protein. Peptides were ranked in descending order of predicted preference by ROP17 and ROP18 by “prophet” analysis with 100% being the most preferred peptide and 0% being the least preferred peptide in an individual protein based on the probability score matrix. Thr102 and Thr108 peptide substrates preferred by ROP17 are highlighted in blue and those preferred by ROP18 in red. The percentage preference for these residues within each individual protein is listed. Proteins lacking a Thr at a particular conserved position are denoted by (N/A). (B-E) The LC-MS/MS analysis was further tested for the confidence of the phosphorylation localization using Scaffold PTM. Peptide ion scores calculated on the most relevant peaks to differentiate the phosphosites were used to determine the probability that a phosphorylation event occurred specifically at either Thr102 (denoted as T5) (B-C) or Thr107 (denoted as T10) (D-E). The Thr108 (denoted as T11) is also listed but no phosphorylation of this residue was observed in the analysis. The confidence level and Ascore for each phosphopeptide is listed for each site in (B and D). In Scaffold PTM, the Ascore utilizes the optimal peak depth for each spectra that best separates the best score from the second best score (denoted by the dashed vertical line in C and E). This method allows the Ascore calculation to account for varying noise levels in different spectra.



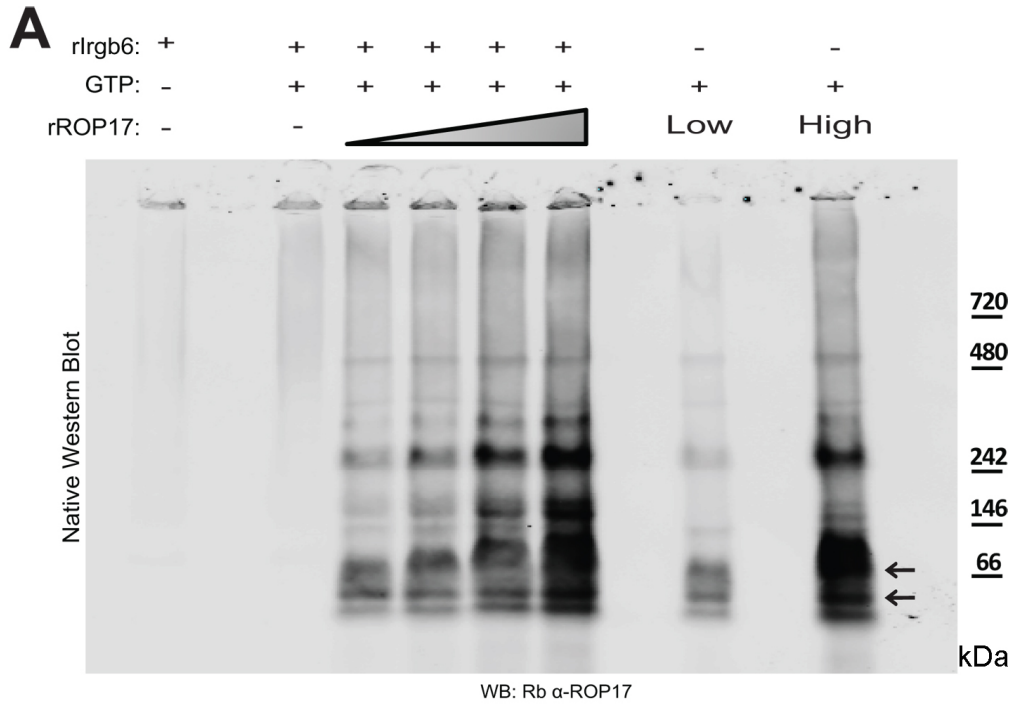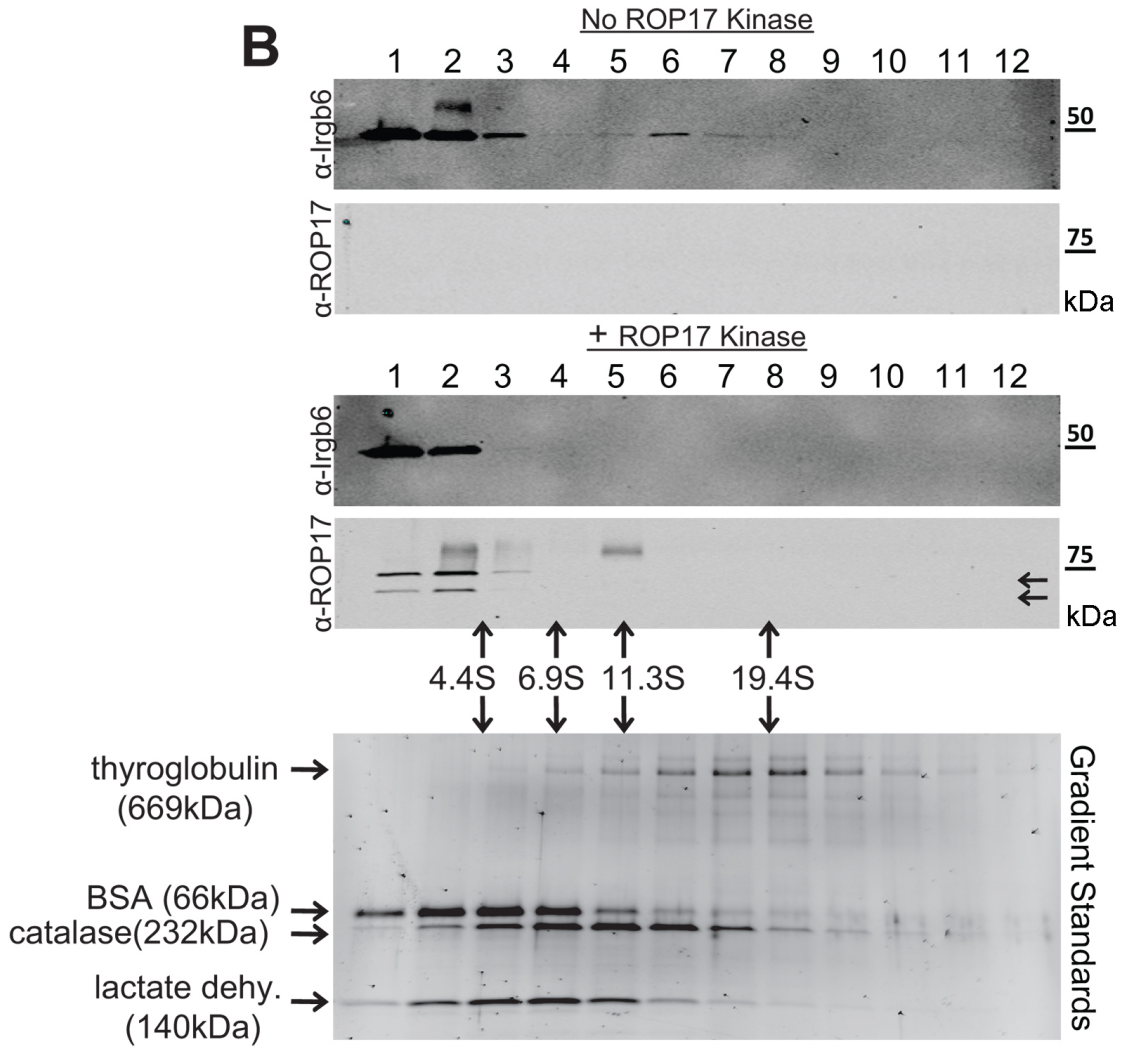

**Figure S6. Contribution of rROP17 to phosphorylation and Irgb6 polymer disassembly.**

Related to Figure 6. (A) *In vitro* kinase reaction combining rROP17 and rIrgb6 (as shown in Figure 6G) was carried out for 30 min at 37°C followed by Native-PAGE gel (8-16%) separation and Western blotting for ROP17. Arrows indicate major and minor species of recombinant ROP17 protein. Additional lanes containing rROP17 without rIrgb6 both at the low (0.5 µg) and high (4 µg) concentrations used in Figure 6G are shown. (B) Irgb6 subjected to a kinase reaction with or without rROP17 for 30 min at 37°C was fractionated on a 10-30% glycerol gradient. Gradient fractions were resolved on 8-16% SDS-PAGE gels, and probed with antibodies against Irgb6 and ROP17. Arrows indicate major/minor species of purified recombinant ROP17. Western blots were imaged on the ODYSSEY imager using LI-COR specific secondary antibodies. Sedimentation coefficients were determined using standards run in parallel. Lower gel stained with SYPRO Ruby and imaged on a Bio-Rad Gel Doc using UV transillumination.

**Table S1 Common Contaminants of Rhopty Complexes. Related to Table 1.**

| <b>Protein ID <i>T. gondii</i><sup>a</sup></b> | <b>Name/Motif</b>                          | <b>Signal Peptide<sup>c</sup></b> | <b>ROP5-TAP</b>     | <b>ROP18-TAP</b> | <b>ROP17-TAP</b> |
|------------------------------------------------|--------------------------------------------|-----------------------------------|---------------------|------------------|------------------|
| TGGT1_072750                                   | selenophosphate synthase                   | no                                | 12(14) <sup>b</sup> | 10(10)           | ND               |
| TGGT1_101680                                   | microtubule-binding protein                | no                                | 9(9)                | 9(9)             | ND               |
| TGGT1_018920                                   | hypothetical                               | no                                | 8(10)               | 13(15)           | ND               |
| TGGT1_073240                                   | 3', 5'-cyclic nucleotide phosphodiesterase | no                                | 8(9)                | 6(7)             | ND               |
| TGGT1_056160                                   | 60S ribosomal protein L4                   | no                                | 8(9)                | 9(13)            | ND               |
| TGGT1_051860                                   | 40S ribosomal protein S7                   | no                                | 8(8)                | 9(14)            | ND               |
| TGGT1_020420                                   | 40S ribosomal protein S4                   | no                                | 6(11)               | 6(13)            | ND               |
| TGGT1_114810                                   | 40S ribosomal protein S3A                  | no                                | 6(7)                | 11(14)           | ND               |
| TGGT1_050780                                   | hypothetical                               | no                                | 6(7)                | 6(9)             | ND               |
| TGGT1_006930                                   | 60S ribosomal protein L13                  | no                                | 6(6)                | 7(8)             | ND               |
| TGGT1_088710                                   | hypothetical                               | no                                | 6(6)                | 9(11)            | ND               |
| TGGT1_088710                                   | hypothetical                               | no                                | 6(6)                | 9(11)            | ND               |
| TGGT1_025360                                   | heat shock protein 60                      | no                                | 5(9)                | ND               | 7(10)            |
| TGGT1_024480                                   | 40S ribosomal protein S9                   | no                                | 5(6)                | 7(10)            | ND               |
| TGGT1_072950                                   | KH domain                                  | no                                | 5(5)                | ND               | 6(21)            |
| TGGT1_069190                                   | DEAD/DEAH box helicase                     | no                                | ND                  | 15(17)           | 12(16)           |
| TGGT1_071470                                   | hypothetical                               | no                                | ND                  | 8(9)             | 9(14)            |

<sup>a</sup> The cut-off for inclusion of individual proteins into this list was set at five or more unique peptide matches with a probability of 0.95 or above. <sup>b</sup> Numbers of unique peptides is indicated and those in parenthesis indicate the number of spectra detected for each protein. <sup>c</sup> This list includes all proteins lacking a signal peptide. ND, none detected.

**Table S2 Strains used in this study. Related to Experimental Procedures.**

| Parental Strain                   | Strain Genotype                                               | Drug Selection                               | Strain Description                                                                                                                                                  |
|-----------------------------------|---------------------------------------------------------------|----------------------------------------------|---------------------------------------------------------------------------------------------------------------------------------------------------------------------|
| GT1 Type I                        | GT1 Type 1::Tet-Repressor-YFP::CAM                            | chloramphenicol (Cm)                         | Parental line expressing the tetracycline repressor fused to YFP and used in generation of all successive inducible TAP-tag expression strains.                     |
| GT1 Type I                        | GT1 Type 1::Tet-Repressor-YFP::Cam::ROP5-TAP::Ble             | Cm and phleomycin (Ble)                      | Parasite strain expressing the TAP-tagged ROP5 gene.                                                                                                                |
| GT1 Type I                        | GT1 Type 1::Tet-Repressor-YFP::Cam::ROP17-TAP::Ble            | Cm and Ble                                   | Parasite strain expressing the TAP-tagged ROP17 gene.                                                                                                               |
| GT1 Type I                        | GT1 Type 1::Tet-Repressor-YFP::Cam::ROP18-TAP::Ble            | Cm and Ble                                   | Parasite strain expressing the TAP-tagged ROP18 gene.                                                                                                               |
| GT1 Type I                        | GT1 Type 1::Tet-Repressor-YFP::Cam::ROP17D/A-TAP::Ble         | Cm and Ble                                   | Parasite strain expressing the TAP-tagged ROP17 gene with a catalytic aspartate mutated to alanine to inactivate the enzyme and create a catalytically dead mutant. |
| GT1 Type I                        | GT1 Type 1::Tet-Repressor-YFP::Cam::mCherry-TAP::Ble          | Cm and Ble                                   | Parasite strain expressing the TAP-tagged mCherry gene to serve as a negative control for specificity of the TAP-tag.                                               |
| RH Type I lacking Ku80 gene (VBC) | $\Delta ku80/\Delta rop17::HXGPRT^R$                          | Mycophenolic Acid/Xanthine (MPA/Xa)          | Knockout line of ROP17. Used as the parental line in subsequent parasite lines.                                                                                     |
| RH Type I lacking Ku80 gene (VBC) | $\Delta ku80/\Delta rop17::cLUC$                              | Negative Selection of HXGPRT: 6-Thioxanthine | Generated as an intermediate strain to recycle the HXGPRT drug selection marker for the subsequent ROP18 knockout line.                                             |
| RH Type I lacking Ku80 gene (VBC) | $\Delta ku80/\Delta rop17::cLUC/\Delta rop18::HXGPRT^R$       | (MPA/Xa)                                     | Knockout line of ROP17 and ROP18 (double deletion strain).                                                                                                          |
| RH Type I lacking Ku80 gene (VBC) | $\Delta ku80/\Delta rop17::ROP17/DHFR^R/\Delta rop18::HXGPRT$ | Pyrimethamine (Pyr)                          | Complemented cell line containing ROP17 under its endogenous promoter.                                                                                              |

**Table S3 Primers used in this study. Related to Experimental Procedures.**

| Application              | Plasmid                                            | Name                               | Sequence, 5'-3'                                           | Polarity                      |            |
|--------------------------|----------------------------------------------------|------------------------------------|-----------------------------------------------------------|-------------------------------|------------|
| <b>Tet-On-Tap</b>        | RPS13+Tet-Operator                                 | A7                                 | GACGGTACCAGCTTGTCTAGTGCATGACACA                           | sense                         |            |
|                          | RPS13+Tet-Operator                                 | A24                                | CTACAATTGCGCCATTTTACGGTGACGAAGCCACCTGAGGAAGACGCAGAG       | anti-sense                    |            |
|                          | MCS+TAP-tag                                        | A9                                 | GATCAATTGCCTAGGAAGCTTCTCGAGGGATC                          | sense                         |            |
|                          | MCS+TAP-tag                                        | A10                                | CGATTAATTAATCAGGTTGACTTCCCCGCGG                           | anti-sense                    |            |
|                          | SAG/Ble/SAG drug marker                            | A11                                | GATACTAGTGTCTTCAAGGTTTTACATCCGTTGCC                       | sense                         |            |
|                          | SAG/Ble/SAG drug marker                            | A12                                | GTAAC TAGTGAAGAGCTCGGGGGGCAAGAA                           | anti-sense                    |            |
| <b>Mutagenesis</b>       | C1418G                                             | A15                                | CACTATCGAAAAGGATTCTAGGTTTCTATCCTCTGC                      | mutate                        |            |
|                          | G1565C                                             | A16                                | GAATCCGAGAGAGGCATCCAACCCACCGA                             | mutate                        |            |
|                          | C1990G                                             | A17                                | ATCAGTGATAGAGATCTGTAGATTCTCGACGGGT                        | mutate                        |            |
|                          | G3040C                                             | A18                                | CCCCCGAGGGGGCATCCACTAGTGC                                 | mutate                        |            |
|                          | G3460C                                             | A19                                | GGAGCTTACCATGCGTCTACAAGGTGGATGC                           | mutate                        |            |
|                          | C4574G                                             | A20                                | CCGAGCTTCTCACTAGTTGTAGAGCGGCC                             | mutate                        |            |
|                          | C1307A ROP17 D/A- TAP-tag mutant                   | E1                                 | CAACAAGAAAATTTGCAAGTTTACAGCGCCATGAACAAGTCCGAA             | mutate                        |            |
| <b>TAP-Expression</b>    | ROP5-TAP                                           | B5                                 | CATAAGCTTATGGCGACGAAGCTCGTAGACTAGCC                       | sense                         |            |
|                          | ROP5-TAP                                           | B6                                 | GATGGATCCAGCGACTGAGGGCGCAGCA                              | anti-sense                    |            |
|                          | ROP17-TAP                                          | A35                                | GTAAAGCTTATGGAGTTGGTGTGTGCTTTGTGATAATAAC                  | sense                         |            |
|                          | ROP17-TAP                                          | A36                                | GATGGATCCCTCCTTCTGTAATAAAGCCGCCTC                         | anti-sense                    |            |
|                          | ROP18-TAP                                          | A33                                | GTAAAGCTTATGTTTTCGGTACAGCGGCCACC                          | sense                         |            |
|                          | ROP18-TAP                                          | A34                                | GATGGATCCTTCTGTGTGGAGATGTTCTGCTG                          | anti-sense                    |            |
| <b>KO Constructs</b>     | ROP17-KO B4-B1r upstream-flank                     | C26                                | GGGGACAACCTTTGTATAGAAAAGTTGGGAAGTGCAGCGAGACCTAAAGCTG      | sense                         |            |
|                          | ROP17-KO B4-B1r upstream-flank                     | C27                                | GGGGACTGCTTTTTGTACAAAAGTTGGGCGAGTACCGACGAAGCTTCAAC        | anti-sense                    |            |
|                          | ROP17-KO B2r-B3 downstream-flank                   | C28                                | GGGGACAGCTTTCTTGTACAAAAGTTGGGATGCGGTCAATGCAACAAGAAAG      | sense                         |            |
|                          | ROP17-KO B2r-B3 downstream-flank                   | C29                                | GGGCAGGACTGTGTACCACGGAATGCAACTTTATATACAAAAGTTGTCCCC       | anti-sense                    |            |
|                          | ROP18-KO B4-B1r upstream-flank                     | C22                                | GGGGACAACCTTTGTATAGAAAAGTTGGTTCGGTCTCCAGGTCTCGAAGAG       | sense                         |            |
|                          | ROP18-KO B4-B1r upstream-flank                     | C23                                | GGGGACTGCTTTTTGTACAAAAGTTGCACAACCTTTCACACAAAAGTTGGAC      | anti-sense                    |            |
|                          | ROP18-KO B2r-B3 downstream-flank                   | C24                                | GGGGACAGCTTTCTTGTACAAAAGTTGGGAACGTGGCGGTGCCGCCCTACCG      | sense                         |            |
|                          | ROP18-KO B2r-B3 downstream-flank                   | C25                                | GGGGACAACCTTTGTATAATAAAGTTGGTACAAGAGATATACAAGGACAGCTGGAAC | anti-sense                    |            |
|                          | <b>E. coli Expression</b>                          | pET22b expression construct primer | rROP17 For                                                | CATATGCTTCTTTTACGGTACCAACGA   | sense      |
|                          |                                                    | pET22b expression construct primer | rROP17Rev                                                 | AAGCTTCTCCTTCTGTAATAAAGCCGCCT | anti-sense |
| <b>Screening Primers</b> | Diagnostic ROP17 Knockout upstream integration     | A64                                | CAATACCTGCACAGCATTGCCGAGCTGACAG                           | sense                         |            |
|                          | Diagnostic ROP17 Knockout upstream integration     | A65                                | GTCGAACAAAGCACGGAGGAGAGACGGAAAG                           | anti-sense                    |            |
|                          | Diagnostic ROP17 Knockout downstream integration   | A66                                | ACACCATTTGCAGATCGATAATCTGCGACCGC                          | sense                         |            |
|                          | Diagnostic ROP17 Knockout downstream integration   | A67                                | GCGTGATAGTGTCTCCCGATTCTGAGAACAGTCG                        | anti-sense                    |            |
|                          | Diagnostic middle HXGPRT drug cassette integration | A26                                | GATGAATCCAGCACGAAACCTTGCATTCAAAC                          | sense                         |            |
|                          | Diagnostic middle HXGPRT drug cassette integration | A14                                | CATACTAGTTTCAATGATCCCCCTCCACCGCGG                         | anti-sense                    |            |
|                          | Diagnostic ROP18 Knockout upstream integration     | C80                                | GGTATATGTGGAGGCACGCATGTTATGCGTGTGTATG                     | sense                         |            |
|                          | Diagnostic ROP18 Knockout upstream integration     | A65                                | GTCGAACAAAGCACGGAGGAGAGACGGAAAG                           | anti-sense                    |            |
|                          | Diagnostic ROP18 Knockout downstream integration   | A66                                | ACACCATTTGCAGATCGATAATCTGCGACCGC                          | sense                         |            |
|                          | Diagnostic ROP18 Knockout downstream integration   | C81                                | CACGAATGCGAAATTTGGCATCCAGACACACAACGAAAC                   | anti-sense                    |            |
|                          | Diagnostic ROP17 cleanup upstream integration      | A64                                | CAATACCTGCACAGCATTGCCGAGCTGACAG                           | sense                         |            |
|                          | Diagnostic ROP17 cleanup upstream integration      | C42                                | CCTCCAAAGGATGGAGAGGCTCAGGGCC                              | anti-sense                    |            |
|                          | Diagnostic ROP17 cleanup downstream integration    | C43                                | GATTACCTGGCTGAACGTGTGAGCCATACTAAG                         | sense                         |            |
|                          | Diagnostic ROP17 cleanup downstream integration    | A67                                | GCGTGATAGTGTCTCCCGATTCTGAGAACAGTCG                        | anti-sense                    |            |

**Table S4 Plasmids used in this study. Related to Experimental Procedures.**

| <b>Common Name</b>         | <b>Description</b>                                                                                                                                                                                                                                                                                                                       | <b>Source</b> | <b>Backbone</b>         |
|----------------------------|------------------------------------------------------------------------------------------------------------------------------------------------------------------------------------------------------------------------------------------------------------------------------------------------------------------------------------------|---------------|-------------------------|
| pTet07-Sag1-myc-GFP-Sag1   | Vector containing SAG1 5' and 3' UTR's expressing a myc-tagged GFP. This vector is used in the Tet-Off (TATI) <i>T. gondii</i> lines where tetracycline turns off expression.                                                                                                                                                            | In-house      | N/A                     |
| Tet-On-TAP                 | In house generated TAP-tagging vector used to express Rhoptyr kinases under a tet-inducible promoter.                                                                                                                                                                                                                                    | In-house      | pTet07-Sag1/mycGFP/Sag1 |
| TubYFP/Tr-sagCAT           | Vector containing the Tet-repressor-YFP fusion construct under the Tubulin promoter.                                                                                                                                                                                                                                                     | Dick Schaap   | N/A                     |
| pRS13subIV-23LacZ          | Vector containing <i>T. gondii</i> RPS13 promoter with Tet-operator sites inserted provided Tetracycline inducible expression. This promoter was integrated into the Tet-On-TAP vector.                                                                                                                                                  | Dick Schaap   | N/A                     |
| Gateway 3 Fragment Cloning | Commercially available kit containing 3 pDONR plasmids (P4P1r, P1P2, P2P3) that were used in the generation of the knockout constructs used in this study. Three fragments containing an 5' flanking region, a drug marker and 3' flanking region were combined into the destination vector (R4R3) making the completed knockout vector. | Invitrogen    | N/A                     |
| Gateway 4 Fragment Cloning | Commercially available kit containing 4 pDONR plasmids (P1P5r, P5P4, P4rP3r, P3P2) that could be combined in the R1R2 destination vector. This kit was used to generate the ROP17 complementation vector.                                                                                                                                | Invitrogen    | N/A                     |
| pET22b-rROP17              | <i>E. coli</i> protein expression vector used to generate recombinant ROP17. The ROP17 full-length gene was amplified from <i>T. gondii</i> RH cDNA. Coding sequence starts from amino acid 22 in order to remove the signal sequence. Gene was cloned between NdeI/HindIII on vector pET22b.                                            | Novagen       | pET22b                  |

## Supplementary Experimental Procedures

### ***In Vivo* Infections Studies**

Animals were maintained in an Association for Assessment and Accreditation of Laboratory Animal Care approved facility and the Institutional Care Committee at Washington University in St. Louis, School of Medicine, approved all protocols. Outbred CD-1 and C57BL/6 mice were purchased from Charles River Laboratories. *Ifn $\gamma$ 1*<sup>-/-</sup>, *Rag1*<sup>-/-</sup>, and *Nos2*<sup>-/-</sup> mice, all on a C57BL/6 background, were obtained from Dr. Herbert Virgin (Washington University). Mice deficient in the superoxide-generating NADPH-oxidase gp91 subunit, referred to as X-CGD mice, on a C57BL/6 background were obtained from Dr. Mary C. Dinauer (Washington University). *IrgM3*<sup>-/-</sup> mice on a C57BL/6 background were obtained from Dr. Greg Taylor (Duke University). Knockout mice lines were bred locally at Washington University. Age and sex-matched mice were challenged by intraperitoneal (ip) injection with parasites and cumulative mortality determined for 30 days post injection as a measure of acute virulence (Su et al., 2002). To examine pathology in chronically infected mice, mouse brains were fixed in 10% neutral buffered formalin, dehydrated in ethanol, embedded in paraffin and 5 micron sections stained with hematoxylin and eosin (H&E).

### **Parasite and Cell Culture**

*T. gondii* tachyzoites were serially passaged in human foreskin fibroblast (HFF) monolayers cultured in complete medium (Dulbecco's Modified Eagles Medium (DMEM)(Invitrogen) and supplemented with 10% FBS (HyClone), 2 mM L-glutamine, 10 mM HEPES (pH 7.5) and 20  $\mu$ g/ml gentamicin) (referred to as complete medium) at 37°C in 5% CO<sub>2</sub>. Stable transgenic parasites were selected in chloramphenicol (20 mg/ml)(Sigma), phleomycin (Ble) (5 mg/ml)(Invitrogen), anhydrous tetracycline (Tet) (0.15 mg/ml)(Clontech), pyrimethamine (Pyr) (3 mM)(Sigma), mycophenolic acid (25  $\mu$ g/ml), and xanthine (50  $\mu$ g/ml) (MPA/Xa). Negative selection to remove the HXGPRT maker was performed by growth in complete medium supplemented with 1% dialyzed FBS (Invitrogen), and 6-thioxanthine (340 mg/ml). Cultures were negative for mycoplasma contamination using the e-Myco plus mycoplasma PCR detection kit (Boca Scientific).

### **Recombinant Protein Purification**

Genomic sequences of *ROP17* from the types I, II, and III lineages ([www.Toxodb.org](http://www.Toxodb.org)) were analyzed for cumulative values of polymorphisms using the Synonymous Nonsynonymous

Analysis Program (SNAP). The *ROP17* coding sequence (including amino acids 22-608) (TgGT1\_011620) was amplified by genomic DNA from type I RH strain of *T. gondii* using iProof high-fidelity polymerase (Bio-Rad), cloned into pET22b, and expressed in *E. coli* BL21 (DE3) V2RpAcYc-LIC+LamP-phosphatase cells (obtained from Ray Hui, SGC). The ROP17 protein was C-terminally tagged with His6 (ROP17His6) and *E. coli* cultures were grown to an OD of 0.5 followed by induction with 1 mM IPTG at 15°C in for 16 hr. Clarified bacterial lysates were incubated with HIS-Select Nickel Affinity Gel (Sigma), eluted in 50 mM of imidazole, and dialyzed in 20 mM Tris-HCl pH 8.0, 250 mM NaCl and 10 mM MgCl<sub>2</sub>. Purified ROP17 was stored in 20% glycerol at -80°C. Proteins were resolved on SDS-PAGE stained with SYPRO-Ruby and concentration determined by comparison to BSA standards (Invitrogen). Polyclonal antibodies to ROP17 were generated in CD1 mice by subcutaneous (SC) injections of purified recombinant ROP17 (rROP17) mixed with Freund's Complete Adjuvant in the first injection and Freund's Incomplete Adjuvant in the subsequent boosts.

### **Immunofluorescence Microscopy**

To examine the distribution of proteins in fully permeabilized cells, parasite-infected monolayers were fixed with 4% formaldehyde in PBS for 10 min, permeabilized with 0.1% Triton X-100 for 10 min at room temperature, and blocked in 10% FBS for 15 min. For selective staining of the PVM, parasite-infected monolayers were fixed with 4% formaldehyde in PBS for 10 min, permeabilized with 0.002% digitonin, and blocked in 10% FBS for 15 min. For vacuole formation, parasites were pretreated with cytochalasin D (1 μM for 10 min) and used to challenge monolayer of HFF cells for 30 min at 37°C, as described previously (Håkansson et al., 2001). Monolayers were then fixed with 4% formaldehyde in PBS for 10 min, permeabilized using 0.05% saponin, and blocked in 10% FBS for 15 min, all at 4°C. Samples were incubated with primary antibodies, washed in PBS, and incubated with secondary antibodies (goat anti-mouse IgG or goat anti-rabbit IgG) conjugated to Alexa fluor dyes (Invitrogen). Following staining, the slides were mounted with Prolong Gold and examined with a Zeiss laser scanning confocal microscope LSM510 (Carl Zeiss, Inc.) using a 63X NA 1.6 oil immersion lens and Z-stack images were acquired at 0.36 μm intervals. Images were processed with Photoshop CS4.

### **Clearance Assay**

RAW 264.7 mouse macrophages were seeded onto 96-well clear, flat-bottom plates and were infected with freshly egressed parasites propagated in HFF cells, as described above.



Macrophages were activated with IFN- $\gamma$  (150 units/ml) (R&D Systems) and LPS (10 ng/ml) derived from *E. coli* 055:B5 (Sigma L2880) for 24 hr prior to infection. RAW cells were challenged with parasites in complete medium at 37°C 5% CO<sub>2</sub> for 30 min, washed to remove extracellular parasites, and fixed with 4% formaldehyde either at 1 hr or returned to culture in complete medium and fixed at 20 hr. Cells were permeabilized with 0.1% Triton-X100 and blocked with 1% FBS and 1% normal goat serum. Parasite burden was assessed by in-cell Western blot analysis by probing with rabbit anti-GRA7 antibodies followed by secondary antibody staining with (donkey anti-rabbit IgG) (LI-COR Biosciences) and imaged on the ODYSSEY infrared imager (LI-COR Biosciences). Host cells were normalized via staining with wheat germ agglutinin conjugated to Alexa fluor 680 dye (Invitrogen) that is compatible with the ODYSSEY imager. The percent of initial infection was determined through comparison of infection levels between 1 hr and 20 hr post infection. Experiments were repeated three or more times, with each sample run in duplicate.

### **Recruitment of IRGs to the PVM**

RAW 264.7 mouse macrophages were seeded onto 24-well plates containing coverslips and activated with IFN- $\gamma$  (100 units/ml) and LPS (0.1 ng/ml) for 24 hr. Cells were infected with parasites by incubation in complete medium at 37°C, 5% CO<sub>2</sub> for 30 min. Monolayers were washed and then either fixed immediately or returned to culture for 90 min (2 hr time point). Monolayers were fixed in 4% formaldehyde in PBS, permeabilized with 0.05% saponin for 10 min at room temperature, and blocked in 5 % FBS and 5% normal goat serum. *T. gondii* containing vacuoles were stained with mouse mAb Tg17–113 against dense granule protein 5 (GRA5) (Charif et al., 1990) and Irgb6 was localized via staining with rabbit anti-Irgb6 (Henry et al., 2009) followed by Alexa-conjugated secondary antibodies. In parallel, Irga6 was localized by staining with mouse mAb10D7 anti-Irga6 antibody (Papic et al., 2008) and parasite-containing vacuoles were labeled with rabbit anti-GRA7 antibodies (Dunn et al., 2008), followed by Alexa-conjugated secondary antibodies. The numbers of positive vacuoles were determined by counting of 10 fields using a 40x objective from 3 coverslips in 3 separate experiments.

To determine the intensity of IRG loading onto vacuoles, IF images were acquired at fixed exposure levels and TIFF files were analyzed for fluorescence intensity using Zeiss LSM510 software. Four independent measurements were recorded for IRG loading intensity (2 polar points and 2 medial points). Proximal background fluorescence measurements were taken for

each point. Following background correction, the four point recordings were averaged for each vacuole measurement. Approximately 30 vacuoles per mutant were recorded.

### **Parasite Replication Assay**

RAW 264.7 mouse macrophages were seeded onto 24-well plates containing coverslips. Cells were activated either with IFN- $\gamma$  alone (100 units/ml) or with IFN- $\gamma$  (100 units/ml) and LPS (0.1 ng/ml) for 24 hr. Cells were infected with parasites by incubation in complete medium at 37°C, 5% CO<sub>2</sub> for 30 min followed by washing and return to culture for 20 hr. Monolayers were fixed in 4% formaldehyde in PBS, permeabilized with 0.05% saponin for 10 min at room temperature, and blocked in 5 % FBS and 5% normal goat serum. Parasite-containing vacuoles were stained with mouse anti-SAG1 monoclonal antibody DG52 followed by Alexa-conjugated secondary antibodies. The number of parasites per vacuole was determined by counting of 10 fields using a 40x objective from 2 coverslips in 3 separate experiments. The average number of parasites per vacuole was determined for each mutant

### **Extract Preparation and Gradient Analysis**

*Toxoplasma gondii* whole cell extract was generated by sonicating freshly egressed tachyzoites in extraction buffer (20 mM Tris-HCl pH 7.6, 150 mM KCl, 10 mM MgCl<sub>2</sub>, 1 mM EDTA, 0.4% NP-40, cOmplete™ EDTA free protease inhibitor cocktail (Roche) and 1 mM DTT) and adjusted to a concentration of 0.3 mg /ml. Extracts were centrifuged in the TLA100.3 rotor at 60,000 rpm (156,424g) for 10 min and the soluble portion retained for further analysis. A 10-30% linear glycerol gradient was generated using the Gradient Master gradient maker (BioComp Instruments). Clarified parasite lysate (200  $\mu$ L) was loaded onto the top of the gradient and centrifuged in a Beckman SW41 rotor at 111,000g for 20 hr. Gradients were fractionated from the top and sedimentation values were determined using BSA (4.4S, 66 kDa), lactate dehydrogenase (6.9S, 140 kDa), catalase (11.3S, 232 kDa), and thyroglobulin (19.4S, 669 kDa) as standards (Sigma).

### **Immunoprecipitation (IP) and Western Blotting**

Freshly harvested parasites were lysed in extraction buffer and clarified by centrifugation as described previously above. For IP's, antibodies were added to clarified extracts and incubated at 4°C for 2 hr then incubated with Protein G Dynabeads (Invitrogen) for 2 hr at 4°C with rotation. Beads were washed with extraction buffer 3 times with 10 min incubations at 4°C. Samples were eluted using denaturing SDS-PAGE sample buffer, resolved on 8-16% acrylamide gels, and transferred to nitrocellulose. For comparison, *T. gondii* parasite lysates

( $5 \times 10^6$  parasites/lane) were resolved on SDS-PAGE denaturing gels and transferred to nitrocellulose. Blots were blocked in 5% milk in Tris-buffered saline (TBS) pH 7.5. Western blots were probed with rabbit (Rb) anti-Irgb6 (Henry et al., 2009), Rb anti-ROP5 (Behnke et al., 2011), Rb anti-ROP18 (Taylor et al., 2006) mouse (Mo) anti-ROP17, mouse mAb anti-MIC2 (6D10) (Wan et al., 1997) or Rb anti-*T. gondii* aldolase (TgALD1) (Jewett and Sibley, 2003). Primary antibodies were incubated in either 3% milk in TBS or 3% BSA in TBS for 1 hr at room temperature followed by washing in TBS-Tween (0.5%). Blots were incubated with secondary antibodies conjugated to IRDye 680CW (donkey anti-rabbit IgG) or IRDye 800CW (donkey anti-mouse IgG) (LI-COR Biosciences) and signals detected using the ODYSSEY infrared imager (LI-COR Biosciences). Images were processed and analyzed using the ODYSSEY infrared imaging system software.

### **In Vitro Kinase Assays**

Kinase activity was tested on heterologous substrates including Casein-a (1  $\mu$ g/reaction) (EMD Chemicals), dephosphorylated myelin basic protein (dMBP) (0.5-10  $\mu$ g/reaction) (Millipore), or on recombinantly expressed and purified Irgb6 and Irga6 (2  $\mu$ g/reaction), as described previously (Fentress et al., 2010). Briefly, Irgb6 and Irga6 full coding sequences were *E. coli* expressed with an N-terminal fusion to GST followed by purification with glutathione bound agarose beads (GE Healthcare). Proteins were specifically eluted with PreScission Protease enzyme (GE Healthcare) to release the GST tag that was removed by binding to glutathione beads. Kinase reactions were conducted in 25 mM Tris-HCl pH 7.5, 15 mM  $MgCl_2$  and 2 mM  $MnCl_2$  containing 10  $\mu$ Ci of  $^{32}P$   $\gamma$ -ATP (specific activity: 3,000 Ci/mmol) (Perkin Elmer, Inc) in addition to 33  $\mu$ M cold ATP (Sigma-Aldrich). Reactions were allowed to proceed at 30°C for 40 min, samples were solubilized in denaturing SDS PAGE sample buffer, resolved by PAGE, and either dried or transferred to nitrocellulose before imaging with an FLA5000 phosphorimager (FujiFilm).

### **Native Gel Kinase Assay**

Purified recombinant Irgb6 protein (2  $\mu$ g / reaction) was used in a kinase reaction conducted in 25 mM Tris-HCl pH 7.5, 15 mM  $MgCl_2$  2 mM  $MnCl_2$ , 1 mM DTT in the presence of 65  $\mu$ M ATP (Sigma-Aldrich), in the presence or absence of 10 mM GTP (Sigma). Recombinant ROP17 kinase was added to the reaction at doses of 0, 0.5, 1, 2 or 4  $\mu$ g / reaction. Kinase reactions were allowed to proceed at 37°C for 30 min, diluted with 2x Native sample buffer (Invitrogen), and loaded onto an 8-16% PAGE gel. Native Mark (Invitrogen) was loaded as a size marker.

The samples were run at 4°C for 20 hr at 40 v, followed by blotting onto nitrocellulose for 8 hr at 50 v. A portion of the reaction products were denatured by boiling with 2X SDS sample buffer followed by separation on an SDS-PAGE gel to provide a control for equal loading. Irgb6 was visualized using Rb anti-Irgb6 (Henry et al., 2009) and secondary LI-COR antibodies. Threonine phosphorylation by ROP17 was observed by probing with Rb anti-phosphothreonine antibody (Cell Signaling) and visualized with LI-COR secondary antibodies. ROP17 was visualized by probing with Rb anti-ROP17 (Covance) followed by staining with LI-COR secondary antibodies. Blots were imaged on the LI-COR ODYSSEY Imager.

### **Glycerol Gradient Analysis of Recombinant Proteins**

Kinase reactions using rROP17 and rIrgb6 used in the native gel analysis were prepared as described above and loaded onto 10-30% glycerol gradients in the presence of aluminum fluoride to stabilize the IRG oligomer as described (Papic et al., 2008). Gradients were centrifuged in a Beckman SW41 rotor at 111,000g for 10 hr. Gradients were fractionated from the top and sedimentation values were determined using BSA (4.4S, 66 kDa), lactate dehydrogenase (6.9S, 140 kDa), catalase (11.3S, 232 kDa), and thyroglobulin (19.4S, 669 kDa) as standards (Sigma). Samples were resolved on 8-16% SDS-PAGE gels followed by blotting to nitrocellulose. Blots were probed with Rb anti-Irgb6 and Rb anti-ROP17 followed by staining with LI-COR secondary antibodies. Blots were imaged on the LI-COR ODYSSEY Imager.

### **Motif Analysis**

The phosphorylation site consensus for ROP18 was determined using a positional scanning peptide array incubated with kinase (8 ng/μl), <sup>32</sup>P γ-ATP (50 μM at 30 μCi/ml) for 2 hr at 30°C, as described (Turk et al., 2006). Aliquots were spotted onto streptavidin-coated membranes (Promega), washed, air-dried, and exposed to a phosphor imaging screen. Radiolabel incorporation into each peptide was quantified with QuantityOne software (BioRad), and the data were normalized as described (Turk et al., 2006). Phospho-blot data were normalized to adjust the values for Thr (multiplied by 0.5) and converted to a WebLogo (Crooks et al., 2004). The normalized values from the ROP17 phosphopeptide array were used to create a Gribskov protein profile suitable for use with “prophet” available from EMBOSS (Rice et al., 2000). Mouse IRG family members were searched using the ROP17 motif to determine preferred ten-letter words centered on all possible Thr residues. The top five scoring T words from each IRG protein were then submitted to MEME (Bailey et al., 2006) to produce up to three distinct MEME logos.

## Generation of Knockout and Tagged Parasite Lines

Rhoptry kinase genes of interest were PCR-amplified from the GT1 strain gDNA, cloned into the Tet-repressible expression construct, and expression was induced with 0.15 µg/ml anhydrous tetracycline (Tet). Knockout (KO) and cleanup constructs were generated using the 3-fragment Gateway™ system (Invitrogen) where homologous regions upstream and downstream of the target gene were cloned into the pDONR vectors as well as the drug selection marker HXGPRT. The full KO vectors containing a drug selection marker flanked by regions homologous to the target gene were transfected into the RHΔ*ku80* parasite background (Huynh and Carruthers, 2009). Generation of cell lines replacing the drug marker with Click-Luciferase (cLUC) were carried out in the same manner. Following drug selection, site-specific integration and gene deletion was monitored by PCR screening and Western blotting. Mutations in ROP17 were introduced with the QuickChange II XL mutagenesis kit (Stratagene). A full list of primers, plasmids, and strains is provided in Tables S2-4.

**Generation of Tet-On-TAP Cloning Vector.** The pTet07-SAG1/myc-GFP/SAG1 vector was digested with KpnI/PacI restriction enzymes followed by phosphatase treatment. The RPS13 promoter containing integrated Tet-operator sites was amplified with 5' KpnI and 3' MfeI restriction sites that include a *T. gondii* specific Kozak sequence and Alanine as the 2<sup>nd</sup> amino acid to maximize expression ((gtcaaa: Kozak) and (atggcg: start Methonine and Alanine)) sequence in the 3' end before MfeI and Start codon. The multiple cloning site (MCS) and TAP-tag were amplified with 5' MfeI and 3' PacI cut sites. A 3 fragment ligation was carried out with the digested vector, RPS13 promoter and MCS-TAP-tag fusion. The assembled vector was digested with SpeI followed by phosphatase treatment and gel purification. A bleomycin (ble) resistance gene driven by SAG1 promoters was amplified with 5' and 3' SpeI cut sites and the drug marker was ligated into the Tet-On-TAP vector. The drug cassette was checked for orientation via sequencing/digestion. A total of 6 additional sites were mutated to remove duplicate restriction sites in the MCS. Primers A7/A24 were used to amplify the RPS13 promoter with Tet-Operators (Table S3). Primers A9/10 were used to amplify the MCS-TAP-tag fusion (Table S3). Primers A11/A12 were used to amplify the SAG/Ble/SAG drug marker cassette (Table S3). Redundant restriction sites were removed using the mutagenesis primers A15, A16, A17, A18, A19 and A20 (Table S3). Amplification of Rhoptry kinases for cloning into Tet-On-TAP vector: ROP5 (B5/B6), ROP17 (A35/A36), ROP18 (A33/A34).

## Tandem Affinity Purification (TAP)

For scale up, L929 cells from four T175 flasks grown to confluency were trypsinized and transferred to a 1 L spinner flask (Bellco Biotechnology) grown in suspension in 500 ml of complete medium. The cell spinner was operated between 50-60 revolutions per min max. When cells reached a concentration of  $5 \times 10^5$  cells/ml, they were infected at a multiplicity of infection of 10:1 as follows. The host cells and *T. gondii* were centrifuged together at 900g at 4°C for 10 min and then transferred back into the spinner flask. To monitor the efficiency of infection, samples of infected host cells were taken at 24 and 36 hr. Assessment of the percentage of infected cells was done via flow cytometry to detect the constitutively expressed Tet-Repressor fused to YFP. An infection rate of 80-90% provided optimal yields. Parasites were induced to express the TAP-tagged construct 2 hr after the infection step by addition of 0.15 µg/ml Tet. At 48 hr, the cells were centrifuged at 1,000g at 4°C for 10 min and the pellet passed through a 22 gauge needle 3 times to lyse any remaining host cells. Parasites were washed 2 times with cold PBS to remove contaminating debris. Approximately 4 x 500 ml spinner flask infections were used per TAP purification procedure that yielded 3 to 5 grams w/w parasite material. For the TAP-purification, parasites were lysed by sonication in extraction buffer (50 mM Tris-HCl pH 7.6, 150 mM KCl, 1 mM EDTA, 1 x cOmplete EDTA free protease inhibitor (Roche) and 0.5% NP-40. The extract was centrifuged in a TLA100.3 rotor at 90,000 rpm (437,003g) for 10 min in a Beckman Optimal TL Ultracentrifuge. The soluble portion was recovered and the pellet was re-extracted with sonication as above with an equal volume of extraction buffer without NP-40. The pellet extract was centrifuged again and the soluble portion was removed and combined with the initial soluble portion to lower the final concentration of NP-40 to approximately 0.2%. The extract was applied to Fast Flow Agarose-IgG beads (GE Healthcare) at 4°C and rocked for 2 hr. The agarose beads were captured in a disposable Pierce 1 ml column and washed with IgG binding buffer (20 mM Tris-HCl pH 7.4, 150 mM KCl, 1 mM EDTA, and 0.1% NP-40). The TAP-tagged protein was eluted with 100 units of TEV protease (Invitrogen) onto calmodulin bound agarose beads (Agilent) in the presence of calmodulin binding buffer (20 mM Tris-HCl pH 7.6, 150 mM KCl, 0.1% NP-40, 10 mM B-mercaptoethanol, 1 mM MgOAc, 1 mM imidazole and 2 mM CaCl<sub>2</sub>). After binding, the column was washed with calmodulin binding buffer and the sample eluted with calmodulin elution buffer (20 mM Tris-HCl pH 7.6, 150 mM KCl, 0.1% NP-40, 10 mM B-mercaptoethanol, 1 mM imidazole, 1 mM EDTA and 3 mM EGTA). Sample fractions were then either run on SDS-PAGE gels, precipitated for MS analysis preparation, or stored in 10% glycerol at -80°C.

## MS Analyses

Fractions from calmodulin column were mixed with 1/5<sup>th</sup> vol of 100% trichloric acid and 0.5% deoxycholate, incubated on ice for 30 min, and centrifuged for 30 min at 18,000g at 4 °C. The pellet was washed with ice-cold acetone and air-dried. A two-step protocol with LysC and trypsin proteases was carried out. The pellet was re-suspended in 25 µl of LysC buffer (8 M urea, 100 mM Tris-HCl (pH 8.5)), LysC added to a 1:100 mass ratio and incubated at 37 °C for 4 h. For trypsin digestion, the mixture was supplemented with 75 µl of 50 mM NH<sub>4</sub>HCO<sub>3</sub> (pH 7.8), trypsin added to a 1:100 mass ratio, and digestion continued overnight. Peptides were purified using Vivapure C18 microspin columns (Vivascience Corp.). Eluted samples were reduced by vacuum evaporation to 1 µl and 10 µl of 2% ACN + 0.1% formic acid was added. Peptides were analyzed using an LTQ-Orbitrap Velos mass spectrometer (Thermo Fisher Scientific, Rockford, USA) coupled with a nanoLC Ultra (Eksigent, Dublin, USA). Each sample (5 µL) was loaded onto a trap column (C<sub>18</sub> PepMap100, 300 µm × 1 mm, 5 µm, 100 Å, Dionex, Sunnyvale, USA) at a flow rate of 4 µL/min for 5 min. Peptide separation were carried out on a C<sub>18</sub> column (Acclaim PepMap C18, 15 cm × 75 µm × 3 µm, 100 Å, Dionex) at a flow rate of 0.26 µL/min. Peptides were separated using a 38 min linear gradient ranging from 2% to 65% B (mobile phase A, 0.1% formic acid; mobile phase B, 0.1% formic acid in ACN). The mass spectrometer was operated in positive ionization mode. The MS survey scan was performed in the FT cell from a mass range of 300 to 2000 m/z. The resolution was set to 60,000 @ 400 m/z and the automatic gain control (AGC) was set to 500,000 ions. CID fragmentation was used for MS/MS and the 20 most intense signals in the survey scan were fragmented. Detection was done in the ion trap with an isolation window of 1.5 m/z and a target value of 10,000 ions. Fragmentation was performed with normalized collision energies of 35% and activation time of 30 ms. Dynamic exclusion was performed with a repeat count of 1 and exclusion duration of 50 sec, and a minimum MS signal for triggering MS/MS is set to 5,000 counts.

Data was processed using Mascot Distiller v2.2 and searched using Mascot Daemon 2.2 (Matrix Science, London, UK). Searches were performed against the *T. gondii* database (v6.1) and NCBI nr database (Jan 2011; 12679685 entries) using the following settings: trypsin as cleavage enzyme; one missed cleavage; oxidation (M) and deamidation (N/Q) as variable modifications. The mass error tolerance for precursor ions was set to 15 ppm and 0.8 Da for

fragment ions. The data was submitted to Scaffold 3.3 (Proteome Software, Portland, OR) to validate MS/MS based peptide and protein identifications. Cutoffs for peptide identifications were set at > 80.0%, and protein identifications > 99.0% probability with at least 2 identified peptides. Direct identification of phosphorylated sites was based on > 95% localization probability.

## Statistical Analyses

Statistical analyses were conducted with GraphPad (Prism5) using nonparametric tests (i.e. Kruskal-Wallis with Dunn's post test comparison), or Student's *t*-tests (2-tailed test of unpaired samples with equal variance). \**P* ≤ 0.05 was considered the minimum cutoff for significance and individual values are reported in the figure legends.

## References

- Behnke, M.S., Khan, A., Wootton, J.C., Dubey, J.P., Tang, K., and Sibley, L.D. (2011). Virulence differences in *Toxoplasma* mediated by amplification of a family of polymorphic pseudokinases. *Proc Natl Acad Sci (USA)* *108*, 9631-9636.
- Charif, H., Darcy, F., Torpier, G., Cesbron-Delauw, M.F., and Capron, A. (1990). *Toxoplasma gondii*: characterization and localization of antigens secreted from tachyzoites. *Exp Parasitol* *71*, 114-124.
- Dunn, J.D., Ravindran, S., Kim, S.K., and Boothroyd, J.C. (2008). The *Toxoplasma gondii* dense granule protein GRA7 is phosphorylated upon invasion and forms an unexpected association with the rhoptyry proteins ROP2 and ROP4. *Infect Immun* *76*, 5853-5861.
- Fentress, S.J., Behnke, M.S., Dunay, I.R., Moashayekhi, M., Rommereim, L.M., Fox, B.A., Bzik, D.J., Taylor, G.A., Turk, B.E., Lichti, C.F., *et al.* (2010). Phosphorylation of immunity-related GTPases by a parasite secretory kinase promotes macrophage survival and virulence. *Cell Host Microbe* *16*, 484-495.
- Håkansson, S., Charron, A.J., and Sibley, L.D. (2001). *Toxoplasma* evacuoles: a two-step process of secretion and fusion forms the parasitophorous vacuole. *Embo J* *20*, 3132-3144.
- Henry, S.C., Daniell, X.G., Burroughs, A.R., Indaram, M., Howell, D.N., Coers, J., Starnbach, M.N., Hunn, J.P., Howard, J.C., Feng, C.G., *et al.* (2009). Balance of Irgm protein activities determines IFN-gamma-induced host defense. *J Leukoc Biol* *85*, 877-885.
- Huynh, M.H., and Carruthers, V.B. (2009). Tagging of endogenous genes in a *Toxoplasma gondii* strain lacking Ku80. *Eukaryot Cell* *8*, 530-539.
- Jewett, T.J., and Sibley, L.D. (2003). Aldolase forms a bridge between cell surface adhesins and the actin cytoskeleton in apicomplexan parasites. *Molec Cell* *11*, 885-894.
- Papic, N., Hunn, J.P., Pawlowski, N., Zerrahn, J., and Howard, J.C. (2008). Inactive and active states of the interferon-inducible resistance GTPase, Irga6, in vivo. *J Biol Chem* *283*, 32143-32151.
- Su, C., Howe, D.K., Dubey, J.P., Ajioka, J.W., and Sibley, L.D. (2002). Identification of quantitative trait loci controlling acute virulence in *Toxoplasma gondii*. *Proc Natl Acad Sci (USA)* *99*, 10753-10758.
- Taylor, S., Barragan, A., Su, C., Fux, B., Fentress, S.J., Tang, K., Beatty, W.L., Haij, E.L., Jerome, M., Behnke, M.S., *et al.* (2006). A secreted serine-threonine kinase determines virulence in the eukaryotic pathogen *Toxoplasma gondii*. *Science* *314*, 1776-1780.
- Wan, K.L., Carruthers, V.B., Sibley, L.D., and Ajioka, J.W. (1997). Molecular characterisation of an expressed sequence tag locus of *Toxoplasma gondii* encoding the micronemal protein MIC2. *Mol Biochem Parasitol* *84*, 203-214.
